# Supplementary material
Source: PubMed Central journal article supplement (PMC10722385)
Supplement: jamaophthalmol-e235698-s001.pdf [file jamaophthalmol-e235698-s001.pdf]

## Supplementary Online Content

Harrison L, Yee P, Sundararajan M, Ding L, Feng S. Local firework restrictions and ocular trauma. *JAMA Ophthalmol*. Published online December 14, 2023.

doi:10.1001/jamaophthalmol.2023.5698

**eTable.** Review of Literature Regarding Firework-Related Ocular Injuries  
**eReferences.**

This supplementary material has been provided by the authors to give readers additional information about their work.

**eTable.** Review of Literature Regarding Firework-Related Ocular Injuries

| Study Authors           | Year Published | Setting                                                                   | Number of Ocular Firework Injuries Described | Measured Impact of Legislation? | Major Findings                                                                                                                                                                                           |
|-------------------------|----------------|---------------------------------------------------------------------------|----------------------------------------------|---------------------------------|----------------------------------------------------------------------------------------------------------------------------------------------------------------------------------------------------------|
| Wilson <sup>1</sup>     | 1982           | Arkansas, Georgia, and West Virginia July 4 <sup>th</sup> Holiday in 1980 | 154                                          | Yes                             | There was trend toward fewer injuries in states with more restrictive fireworks laws (Georgia and West Virginia) compared to Arkansas, but there was limited data.                                       |
| Thygeson <sup>2</sup>   | 2000           | Denmark 1984 - 1998                                                       | 51                                           | No                              | A preventative public health campaign decreased rate of eye injuries per ton of fireworks used nationally.                                                                                               |
| Kuhn et al <sup>3</sup> | 2000           | Alabama and Hungary 1980-1996                                             | 187                                          | Yes                             | There was a lower number of firework related eye injuries in Hungary, where there is an enforced legislative ban on private fireworks displays, compared to Alabama, where there are fewer restrictions. |
| Chan et al <sup>4</sup> | 2004           | Northern Ireland 1990-2001                                                | 23                                           | Yes                             | There was an increase in number of fireworks injuries after lifting of the legislative ban on fireworks in Northern Ireland                                                                              |

|                          |      |                                                                                                                                          |     |                                                                                            |                                                                                                                                                                 |
|--------------------------|------|------------------------------------------------------------------------------------------------------------------------------------------|-----|--------------------------------------------------------------------------------------------|-----------------------------------------------------------------------------------------------------------------------------------------------------------------|
|                          |      |                                                                                                                                          |     |                                                                                            | in 1996, from 6 in the 5 years prior to the lifting of the ban to 17 in the 5 years after.                                                                      |
| Wisse et al <sup>5</sup> | 2009 | Systemic Review including multiple locations including the United States, Australia, The Netherlands, Western Sweden, the United Kingdom | N/A | Yes                                                                                        | Countries or states with restrictive personal firework laws show 87% less ophthalmic firework trauma.                                                           |
| Bull <sup>6</sup>        | 2010 | Norway 2005-2008                                                                                                                         | 77  | Yes                                                                                        | Providing free protective eyewear did not reduce rate of injuries. However, incidence of eye injuries was reduced by half (p=0.03) after banning bottle rockets |
| Chang et al <sup>7</sup> | 2016 | Washington state and Pacific Northwest 2003-2013                                                                                         | 100 | No                                                                                         | Ocular injuries were most common associated with mortars and rockets, with spectators at higher risk of ocular injuries than non-ocular firework injuries.      |
| Wang et al <sup>8</sup>  | 2020 | Southern China 2013-2017                                                                                                                 | 468 | Not directly, but comments that bans in large cities in 2016 may have reduced incidence of | Incidence of firework injuries remained stable from 2013-2017. Injuries primarily affected young males, and rural residents with                                |

|                            |      |                                                                                   |      |                              |                                                                                                                               |
|----------------------------|------|-----------------------------------------------------------------------------------|------|------------------------------|-------------------------------------------------------------------------------------------------------------------------------|
|                            |      |                                                                                   |      | injuries the following year. | most injuries resulting in count fingers vision or worse.                                                                     |
| Shiuey et al <sup>9</sup>  | 2020 | United States (National Electronic Injury Surveillance System database) 1999-2017 | 1007 | No                           | Nearly 2000 ocular firework injuries occur annually nationally in the United States, with most occurring in July and January. |
| Hoskin et al <sup>10</sup> | 2021 | Netherlands, India, Nepal, and Argentina (unspecified dates)                      | 388  | No                           | Severe vision loss from firework injuries were noted during celebrations in multiple countries                                |

## eReferences

1. Wilson RS. Ocular fireworks injuries and blindness: an analysis of 154 cases and a three-state survey comparing the effectiveness of model law regulation. *Ophthalmology*. 1982;89(4):291-297. Medline:7099548 doi:10.1016/S0161-6420(82)34789-2
2. Thygesen J. Ocular injuries caused by fireworks: 25 years of experience with preventive campaigns in Denmark. *Acta Ophthalmol Scand*. 2000;78(1):1-2. Medline:10726778 doi:10.1034/j.1600-0420.2000.078001001.x
3. Kuhn FC, Morris RC, Witherspoon DC, et al. Serious fireworks-related eye injuries. *Ophthalmic Epidemiol*. 2000;7(2):139-148. Medline:10934464 doi:10.1076/0928-6586(200006)721-ZFT139
4. Chan WC, Knox FA, McGinnity FG, Sharkey JA. Serious eye and adnexal injuries from fireworks in Northern Ireland before and after lifting of the firework ban—an ophthalmology unit’s experience. *Int Ophthalmol*. 2004;25(3):167-169. Medline:15847316 doi:10.1007/s10792-004-1958-z
5. Wisse RPL, Bijlsma WR, Stilma JS. Ocular firework trauma: a systematic review on incidence, severity, outcome and prevention. *Br J Ophthalmol*. 2010;94(12):1586-1591. Medline:19846415 doi:10.1136/bjo.2009.168419
6. Bull N. Legislation as a tool to prevent firework-related eye injuries. *Acta Ophthalmol*. 2011;89(8):e654-e655. Medline:21155985 doi:10.1111/j.1755-3768.2010.02061.x
7. Chang IT, Prendes MA, Tarbet KJ, Amadi AJ, Chang SH, Shaftel SS. Ocular injuries from fireworks: the 11-year experience of a US level I trauma center. *Eye (Lond)*. 2016;30(10):1324-1330. Medline:27285323 doi:10.1038/eye.2016.104
8. Wang F, Lou B, Jiang Z, Yang Y, Ma X, Lin X. Changing trends in firework-related eye injuries in Southern China: a 5-year retrospective study of 468 cases. *J Ophthalmol*. 2020;2020:6194519. Medline:32832138 doi:10.1155/2020/6194519
9. Shiuey EJ, Kolomeyer AM, Kolomeyer NN. Assessment of firework-related ocular injury in the US. *JAMA Ophthalmol*.

- 2020;138(6):618-623. Medline:32271352  
doi:10.1001/jamaophthalmol.2020.0832
10. Hoskin AK, Low R, de Faber JT, et al; IGATES Fireworks study group. Eye injuries from fireworks used during celebrations and associated vision loss: the International Globe and Adnexal Trauma Epidemiology Study (IGATES). *Graefes Arch Clin Exp Ophthalmol*. 2022;260(1):371-383. Medline:34453604 doi:10.1007/s00417-021-05284-z
