# Supplementary material
Source: PubMed Central journal article supplement (PMC10722385)
Supplement: jamaophthalmol-e235698-s002.pdf [file jamaophthalmol-e235698-s002.pdf]

## Data Sharing Statement

Harrison. Local Firework Restrictions and Ocular Trauma. *JAMA Ophthalmol*. Published December 14, 2023. doi:10.1001/jamaophthalmol.2023.5698

### Data

**Data available:** Yes

**Data types:** Deidentified participant data

**How to access data:** [shufeng@uw.edu](mailto:shufeng@uw.edu)

**When available:** With publication

### Supporting Documents

**Document types:** None

### Additional Information

**Who can access the data:** Researchers whose proposed use of the data has been approved

**Types of analyses:** Any purpose

**Mechanisms of data availability:** With signed data access agreement after approval of proposal
